# POSITION STATEMENTS & ADA STATEMENTS

## Position Statements

A position statement is an official point of view or belief of the ADA. Position statements are issued on scientific or medical issues related to diabetes. They are published in ADA journals and other scientific/medical publications as appropriate. Position statements must be reviewed and approved by the Professional Practice Committee and, subsequently, by the Executive Committee of the Board of Directors. ADA position statements are typically based on a technical review or other published review and are peer reviewed.

### **Pancreas and Islet Transplantation in Type 1 Diabetes**

*Diabetes Care* 29:935, 2006

### **Screening for Type 2 Diabetes**

*Diabetes Care* 27 (Suppl. 1):S11–S14, 2004

### **Nutrition Principles and Recommendations in Diabetes**

*Diabetes Care* 27 (Suppl. 1):S36–S46, 2004

### **Prevention or Delay of Type 2 Diabetes**

*Diabetes Care* 27 (Suppl. 1):S47–S54, 2004

### **Diabetes Nutrition Recommendations for Health Care Institutions**

*Diabetes Care* 27 (Suppl. 1):S55–S57, 2004

### **Physical Activity/Exercise and Diabetes**

*Diabetes Care* 27 (Suppl. 1):S58–S62, 2004

### **Preventive Foot Care in Diabetes**

*Diabetes Care* 27 (Suppl. 1):S63–S64, 2004

### **Hypertension Management in Adults With Diabetes**

*Diabetes Care* 27 (Suppl. 1):S65–S67, 2004

### **Dyslipidemia Management in Adults With Diabetes**

*Diabetes Care* 27 (Suppl. 1):S68–S71, 2004

### **Aspirin Therapy in Diabetes**

*Diabetes Care* 27 (Suppl. 1):S72–S73, 2004

### **Smoking and Diabetes**

*Diabetes Care* 27 (Suppl. 1):S74–S75, 2004

### **Preconception Care of Women With Diabetes**

*Diabetes Care* 27 (Suppl. 1):S76–S78, 2004

**Nephropathy in Diabetes**

*Diabetes Care* 27 (Suppl. 1):S79–S83, 2004

**Retinopathy in Diabetes**

*Diabetes Care* 27:S84–S87, 2004

**Gestational Diabetes Mellitus**

*Diabetes Care* 27 (Suppl. 1):S88–S90, 2004

**Tests of Glycemia in Diabetes**

*Diabetes Care* 27 (Suppl. 1):S91–S93, 2004

**Hyperglycemic Crises in Diabetes**

*Diabetes Care* 27 (Suppl. 1):S94–S102, 2004

**Hospital Admission Guidelines for Diabetes**

*Diabetes Care* 27 (Suppl. 1):S103, 2004

**Bedside Blood Glucose Monitoring in Hospitals**

*Diabetes Care* 27 (Suppl. 1):S104, 2004

**Pancreas Transplantation in Type 1 Diabetes**

*Diabetes Care* 27 (Suppl. 1):S105, 2004

**Insulin Administration**

*Diabetes Care* 27 (Suppl. 1):S106–S109, 2004

**Continuous Subcutaneous Insulin Infusion**

*Diabetes Care* 27 (Suppl. 1):S110, 2004

**Influenza and Pneumococcal Immunization in Diabetes**

*Diabetes Care* 27 (Suppl. 1):S111–S113, 2004

**Concurrent Care**

*Diabetes Care* 27 (Suppl. 1):S132, 2004

**Prevention of Type 1 Diabetes**

*Diabetes Care* 27 (Suppl. 1):S133, 2004

**Unproven Therapies**

*Diabetes Care* 27 (Suppl. 1):S135, 2004

**ADA STATEMENTS**

An ADA Statement is a focused review on a clinical topic with recommendations. It is authored, and the recommendations are those of the authors based on the evidence presented. ADA Statements are reviewed externally and also by the Professional Practice Committee for overall content. As noted above, the recommendations made are considered by the Professional Practice Committee as part of the review and updating of the “Standards of Medical Care in Diabetes.”

**Weight Management**

Klein S, Sheard NF, Pi-Sunyer X, Daly A, Wylie-Rosett J, Kulkarni K, Clark NG: Weight management through lifestyle modification for the prevention and management of type 2 diabetes: rationale and strategies: a statement of the American Diabetes Association, the North American Association for the Study of Obesity, and the American Society for Clinical Nutrition. *Diabetes Care* 27:2067–2073, 2004

**Dietary Carbohydrate**

Sheard NF, Clark NG, Brand-Miller JC, Franz MJ, Pi-Sunyer FX, Mayer-Davis E, Kulkarni K, Geil P: Dietary carbohydrate (amount and type) in the prevention and management of diabetes: a statement of the American Diabetes Association. *Diabetes Care* 27:2266–2271, 2004

**Children and Adolescents With Type 1 Diabetes**

Silverstein J, Klingensmith G, Copeland K, Plotnick L, Kaufman F, Laffel L, Deeb L, Grey M, Anderson BJ, Holzmeister LA, Clark N: Care of children and adolescents with type 1 diabetes: a statement of the American Diabetes Association. *Diabetes Care* 28:186–212, 2005

**Neuropathy**

Boulton AJM, Vinik AI, Arezzo JC, Bril V, Feldman EL, Freeman R, Malik RA, Maser RE, Sosenko JM, Ziegler D: Diabetic neuropathies: a statement of the American Diabetes Association. *Diabetes Care* 28:956–962, 2005

**Metabolic Syndrome**

Kahn R, Buse J, Ferrannini E, Stern M: The metabolic syndrome: time for a critical appraisal: joint statement from the American Diabetes Association and the European Association for the Study of Diabetes. *Diabetes Care* 28:2289–2304, 2005
